# Supplementary material for: Comparison of the Quality of Chronic Disease Management Between Adults With and Without Dementia
Source: PubMed Central journal article supplement (PMC8120327; doi:10.1001/jamanetworkopen.2021.9622), 2021-05-13
Supplement: jamanetwopen-e219622-s001.pdf [file jamanetwopen-e219622-s001.pdf]

## Supplementary Online Content

Gotanda H, Nuckols T, Mori K, Tsugawa Y. Comparison of the quality of chronic disease management between adults with and without dementia. *JAMA Netw Open*. 2021;4(5):e219622. doi:10.1001/jamanetworkopen.2021.9622

**eTable 1.** Comparison of 5-Year Mortality Index Construct Between NHIS and MEPS

**eTable 2.** Experts' Opinion on Time Horizon to Benefit and Potential Burden of Care from Assessing Care of Vulnerable Elders-3 (ACOVE-3)

**eTable 3.** Comparison of Chronic Disease Management Between Adults with Dementia and Those Without Dementia (With Any Estimated 5-Year Mortality Risk)

**eTable 4.** Comparison of Chronic Disease Management Between Adults With Dementia and Those With Cancer

**eFigure.** Flowchart of the Study Population

**eReference.**

This supplementary material has been provided by the authors to give readers additional information about their work.

**eTable 1.** Comparison of 5-year mortality index construct between NHIS and MEPS

|   | NHIS (original)                                                                                                                                                                                                                   | pts |  | MEPS                                                                                                                                                                                                                 | pts |
|---|-----------------------------------------------------------------------------------------------------------------------------------------------------------------------------------------------------------------------------------|-----|--|----------------------------------------------------------------------------------------------------------------------------------------------------------------------------------------------------------------------|-----|
| 1 | Age                                                                                                                                                                                                                               |     |  | Age                                                                                                                                                                                                                  |     |
|   | 65-69                                                                                                                                                                                                                             | 0   |  | 65-69                                                                                                                                                                                                                | 0   |
|   | 70-74                                                                                                                                                                                                                             | 1   |  | 70-74                                                                                                                                                                                                                | 1   |
|   | 75-79                                                                                                                                                                                                                             | 3   |  | 75-79                                                                                                                                                                                                                | 3   |
|   | 80-84                                                                                                                                                                                                                             | 5   |  | 80-84                                                                                                                                                                                                                | 5   |
|   | 85+                                                                                                                                                                                                                               | 7   |  | 85+                                                                                                                                                                                                                  | 7   |
| 2 | Sex                                                                                                                                                                                                                               |     |  | Sex                                                                                                                                                                                                                  |     |
|   |                                                                                                                                                                                                                                   | 2   |  | Female                                                                                                                                                                                                               | 2   |
| 3 | BMI                                                                                                                                                                                                                               |     |  | BMI                                                                                                                                                                                                                  |     |
|   | <25                                                                                                                                                                                                                               | 2   |  | <25                                                                                                                                                                                                                  | 2   |
| 4 | Would you say your health in general is:                                                                                                                                                                                          |     |  | In general, compared to other people of your age, would you say that your health is:                                                                                                                                 |     |
|   | Excellent/Very good                                                                                                                                                                                                               | 0   |  | Excellent/Very good                                                                                                                                                                                                  | 0   |
|   | Good                                                                                                                                                                                                                              | 1   |  | Good                                                                                                                                                                                                                 | 1   |
|   | Fair/Poor                                                                                                                                                                                                                         | 2   |  | Fair/Poor                                                                                                                                                                                                            | 2   |
| 5 | Have you ever been told by a doctor or health professional that you had:                                                                                                                                                          |     |  | Diagnoses based on Clinical Classification Software (CCS) codes in MEPS Medical Condition files:                                                                                                                     |     |
|   | Emphysema/chronic bronchitis                                                                                                                                                                                                      | 2   |  | Emphysema/chronic bronchitis                                                                                                                                                                                         | 2   |
|   | A cancer (excluding non-melanoma skin cancer)                                                                                                                                                                                     | 2   |  | A cancer (excluding non-melanoma skin cancer)                                                                                                                                                                        | 2   |
|   | Diabetes (include borderline diabetes)                                                                                                                                                                                            | 2   |  | Diabetes (include borderline diabetes)                                                                                                                                                                               | 2   |
| 6 | Because of a physical mental, or emotional problems, do you need the help of other persons in handling routine needs such as everyday household chores, doing necessary business, shopping, or getting around for other purposes? |     |  | Do you receive help or supervision using the telephone, paying bills, taking medications, preparing light meals, doing laundry, or going shopping (because of an impairment or a physical or mental health problem)? |     |
|   | No                                                                                                                                                                                                                                | 0   |  | No                                                                                                                                                                                                                   | 0   |
|   | Yes                                                                                                                                                                                                                               | 2   |  | Yes                                                                                                                                                                                                                  | 2   |
| 7 | By yourself, and without using any special equipment, how difficult is it for you to walk a quarter of a mile (about 3 city blocks)?                                                                                              |     |  | How much difficulty do you have walking about 3 city blocks or about a quarter of a mile?                                                                                                                            |     |
|   | Not at all difficult                                                                                                                                                                                                              | 0   |  | No difficulty                                                                                                                                                                                                        | 0   |
|   | A little difficult to very difficult                                                                                                                                                                                              | 3   |  | Some difficulty/A lot of difficulty                                                                                                                                                                                  | 3   |
|   | Can't do at all/do not do                                                                                                                                                                                                         | 3   |  | Completely unable to do it                                                                                                                                                                                           | 3   |
| 8 | Which best describes your cigarette use?                                                                                                                                                                                          |     |  | Do you currently smoke?                                                                                                                                                                                              |     |
|   | Never smoked (<100 cigarettes in your entire life)                                                                                                                                                                                | 0   |  | No                                                                                                                                                                                                                   | 0   |
|   | Former smoker                                                                                                                                                                                                                     | 1   |  |                                                                                                                                                                                                                      |     |
|   | Current smoker (smoke some days or every day)                                                                                                                                                                                     | 3   |  | Yes                                                                                                                                                                                                                  | 3   |
| 9 | During the past 12 months, how many times were you hospitalized overnight?                                                                                                                                                        |     |  | Overnight hospitalization based on the MEPS Hospital Inpatient Stays files:                                                                                                                                          |     |
|   | None                                                                                                                                                                                                                              | 0   |  | None                                                                                                                                                                                                                 | 0   |
|   | Once                                                                                                                                                                                                                              | 1   |  | Once                                                                                                                                                                                                                 | 1   |
|   | Twice or more                                                                                                                                                                                                                     | 3   |  | Twice or more                                                                                                                                                                                                        | 3   |

**Notes:** This table was modified from Gotanda H, Ganz DA, Wenger NS. Association Between Estimated Mortality Risk and Measured Quality of Care in Older Adults. *J Am Geriatr Soc.* 2018;66(9):1838-44. Abbreviations: BMI, body mass index. MEPS, Medical Expenditure Panel Survey; NHIS, National Health Interview Survey.

**eTable 2.** Experts' opinion on time horizon to benefit and potential burden of care from Assessing Care of Vulnerable Elders-3 (ACOVE-3)

| Quality indicators                      | Care to be provided to fulfill an indicator                   | Eligibility for an indicator            | Time horizon to benefit | Potential burden of care |
|-----------------------------------------|---------------------------------------------------------------|-----------------------------------------|-------------------------|--------------------------|
| <b>Preventive care</b>                  |                                                               |                                         |                         |                          |
| Influenza vaccine                       | Influenza vaccine within 1y                                   | Age $\geq$ 50 y                         | Short                   | Low                      |
| Smoking cessation counseling            | Smoking cessation counseling within 1y                        | Smokers                                 | Intermediate            | Low                      |
| Dental care                             | Dental visit within 1y                                        | All                                     | Short                   | Low                      |
| <b>Diabetes care</b>                    |                                                               |                                         |                         |                          |
| HbA1c measurement                       | HbA1c measurement at least twice yearly                       | Diabetes                                | Long*                   | Low                      |
| Foot examination                        | Foot examination within 1y                                    | Diabetes                                | Short                   | Low                      |
| Eye examination                         | Eye examination within 1y                                     | Diabetes                                | Long*                   | Low                      |
| <b>Medication treatment</b>             |                                                               |                                         |                         |                          |
| Anticoagulation for atrial fibrillation | Anticoagulation prescription within 1y                        | Atrial fibrillation                     | Short                   | Moderate                 |
| ACE-I/ARB for heart failure             | ACE-I/ARB prescription within 1y                              | Heart failure                           | Intermediate            | Low                      |
| $\beta$ -blocker for heart failure      | $\beta$ -blocker prescription within 1y                       | Heart failure                           | Intermediate            | Low                      |
| Antiplatelet for CAD/MI                 | Antiplatelet prescription within 1y                           | CAD or MI                               | Intermediate            | Low                      |
| Beta-blocker for CAD/MI                 | Beta-blocker prescription within 1y                           | CAD or MI                               | Intermediate            | Low                      |
| Statin for CAD/MI                       | Statin prescription within 1y                                 | CAD or MI                               | Intermediate            | Low                      |
| Antiplatelet for CVA                    | Antiplatelet prescription within 1y                           | CVA                                     | Short                   | Low                      |
| Controller for poorly controlled COPD   | ICS+LABA or LAMA+LABA or ICS+LAMA+LABA prescription within 1y | COPD and systemic steroid use within 1y | Short                   | Low                      |

**Notes:** This table was modified from Wenger NS, Solomon DH, Amin A, Besdine RK, Blazer DG, Cohen H, et al. Application of Assessing Care of Vulnerable Elders-3 Quality Indicators to Patients with Advanced Dementia and Poor Prognosis. *J Am Geriatr Soc.* 2007;55 Suppl 2:S457-63. \*We included these measures in diabetes care composite based on a prior study,<sup>1</sup> even though the experts in the ACOVE-3 project determined that these measures have a “long” time horizon. Abbreviations: HbA1c, hemoglobin A1c; ACE-I, angiotensin-converting enzyme inhibitor; ARB, angiotensin receptor blocker; CAD coronary artery disease; COPD, chronic obstructive pulmonary disease; CVA, cerebral vascular accident; ICS, inhaled corticosteroid; LABA, long-acting  $\beta$  agonist; LAMA, long-acting muscarinic antagonist; MI, myocardial infarction.

**eTable 3.** Comparison of chronic disease management between adults with dementia and those without dementia (with any estimated 5-year mortality risk)

| Composite category   | Adults with dementia (n=1,335) |                                  | Adults without dementia (n=27,128) |                                  | Adjusted absolute difference           |         |
|----------------------|--------------------------------|----------------------------------|------------------------------------|----------------------------------|----------------------------------------|---------|
|                      | Eligible participants, No.     | Composite score, adjusted mean % | Eligible participants, No.         | Composite score, adjusted mean % | Coefficient, percentage point (95% CI) | P value |
| Preventive care      | 1280                           | 61.0                             | 26742                              | 66.9                             | -6.0 (-8.5 to -3.4)                    | <.001   |
| Diabetes care        | 314                            | 74.1                             | 5434                               | 75.1                             | -1.1 (-5.8 to 3.6)                     | .66     |
| Medication treatment | 540                            | 47.8                             | 7020                               | 47.9                             | -0.0 (-4.4 to 4.3)                     | .99     |

**Notes:** Adults without dementia are those without dementia diagnosis regardless of estimated 5-year mortality risk (see main text for more details). See the notes for Table 3 in the main text for more details.

**eTable 4.** Comparison of chronic disease management between adults with dementia and those with cancer

| Composite category   | Adults with dementia (n=1,335) |                                  | Adults without dementia (n=27,128) |                                  | Adjusted absolute difference           |         |
|----------------------|--------------------------------|----------------------------------|------------------------------------|----------------------------------|----------------------------------------|---------|
|                      | Eligible participants, No.     | Composite score, adjusted mean % | Eligible participants, No.         | Composite score, adjusted mean % | Coefficient, percentage point (95% CI) | P value |
| Preventive care      | 1157                           | 63.8                             | 2676                               | 70.7                             | -6.9 (-10.4 to -3.4)                   | <.001   |
| Diabetes care        | 289                            | 75.3                             | 582                                | 77.8                             | -2.5 (-8.8 to 3.7)                     | .43     |
| Medication treatment | 477                            | 55.4                             | 907                                | 44.4                             | 11.0 (4.7 to 17.2)                     | <.001   |

**Notes:** Adults with cancer are those without dementia diagnosis who have cancer (see main text for more details). See the notes for Table 3 in the main text for more details.

**eFigure. Flowchart of the study population**

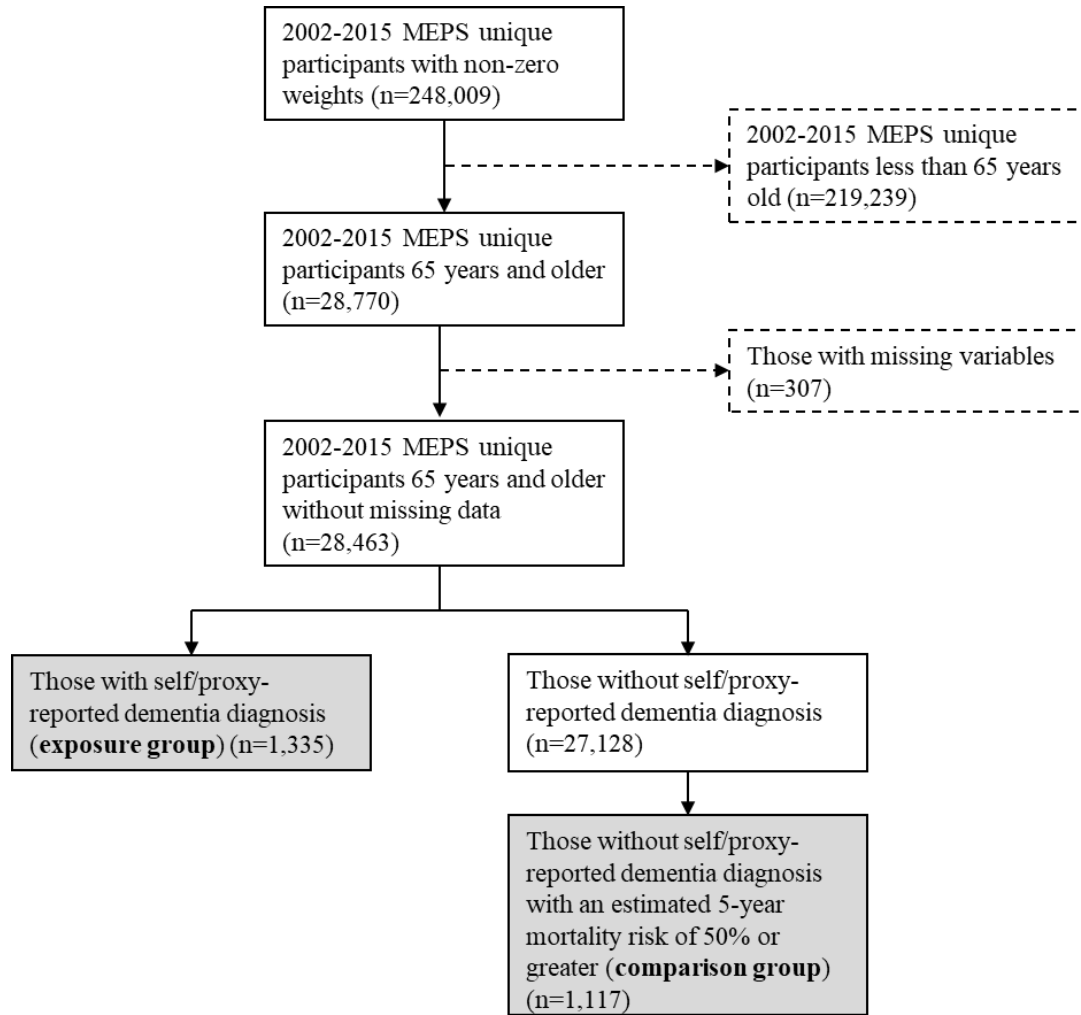

## Supplemental Reference

1. Thorpe CT, Thorpe JM, Kind AJH, Bartels CM, Everett CM, Smith MA. Receipt of monitoring of diabetes mellitus in older adults with comorbid dementia. *J Am Geriatr Soc.* 2012;60(4):644-651.
